1 **Two-species community design of Lactic Acid Bacteria for optimal**  
2 **production of Lactate**

3

4 Maziya Ibrahim<sup>a,b</sup>, Karthik Raman<sup>a,b,c#</sup>

5

6 <sup>a</sup> Department of Biotechnology, Bhupat and Jyoti Mehta School of Biosciences, IIT  
7 Madras, India

8 <sup>b</sup> Initiative for Biological Systems Engineering (IBSE), IIT Madras, India

9 <sup>c</sup> Robert Bosch Centre for Data Science and Artificial Intelligence (RBC-DSAI), IIT  
10 Madras, India

11

12

13 Running Head: Two-species community design of Lactic Acid Bacteria

14

15

16 # Address correspondence to Karthik Raman, [kraman@iitm.ac.in](mailto:kraman@iitm.ac.in)

17

18

19

20

21

22

23

24

## 25 **Abstract**

26 Microbial communities that metabolise pentose and hexose sugars are useful in  
27 producing high-value chemicals, as this can result in the effective conversion of raw  
28 materials to the product, a reduction in the production cost, and increased yield. Here, we  
29 present a computational approach called CAMP (Co-culture/Community Analyses for  
30 Metabolite Production) that simulates and identifies appropriate communities to  
31 produce a metabolite of interest. To demonstrate this approach, we focus on optimal  
32 production of lactate from various Lactic Acid Bacteria. We used genome-scale metabolic  
33 models (GSMMs) belonging to *Lactobacillus*, *Leuconostoc*, and *Pediococcus* species from  
34 the Virtual Metabolic Human (VMH; <https://vmh.life/>) resource and well-curated GSMMs  
35 of *L. plantarum* WCSF1 and *L. reuteri* JCM 1112. We studied 1176 two-species  
36 communities using a constraint-based modelling method for steady-state flux-balance  
37 analysis of communities. Flux variability analysis was used to detect the maximum lactate  
38 flux in a community. Using glucose or xylose as substrates separately or in combination  
39 resulted in either parasitism, amensalism, or mutualism being the dominant interaction  
40 behaviour in the communities. Interaction behaviour between members of the  
41 community was deduced based on variations in the predicted growth rates of  
42 monocultures and co-cultures. Acetaldehyde, ethanol,  $\text{NH}_4^+$ , among other metabolites,  
43 were found to be cross-fed between community members. *L. plantarum* WCSF1 was a  
44 member of communities with high lactate yields. *In silico* community optimisation  
45 strategies to predict reaction knock-outs for improving lactate flux were implemented.  
46 Reaction knock-outs of acetate kinase, phosphate acetyltransferase, and fumarate  
47 reductase in the communities were found to enhance lactate production.

48

## 49 **Importance**

50 Understanding compatibility and interactions based on growth between the members of  
51 a microbial community is imperative to exploit these communities for biotechnological  
52 applications. Towards this goal, here, we introduce a computational analysis framework  
53 that evaluates all possible two-species communities generated from a given set of  
54 microbial species on single or multiple substrates to achieve optimal production of a  
55 target metabolite. As a case study, we analysed communities of Lactic Acid Bacteria to  
56 produce lactate. Lactate is a platform chemical produced experimentally from  
57 lignocellulosic biomass, which constitutes pentoses and hexoses, such as xylose and  
58 glucose. Metabolic engineering strategies, such as reaction knock-outs that can improve  
59 product flux while retaining the community's viability are identified using *in silico*  
60 optimisation methods. Our approach can guide in the selection of most promising  
61 communities for experimental testing and validation to produce valuable bio-based  
62 chemicals.

## 63 **Keywords**

64 Genome-scale metabolic models, constraint-based modelling, metabolic engineering,  
65 cross-feeding, microbial consortia

## 66 **Introduction**

67 In recent years, novel methods for synthesising valuable chemicals include the use of co-  
68 cultures or microbial communities, where two or more microbial populations are  
69 cultured together to derive optimum output of the product (1). In nature, microbes exist  
70 in communities, and the use of natural or engineered consortia have advantages over  
71 single strains. One of the critical features of a consortium is the division of labour or

72 sharing of metabolic burden between the species. The product of one engineered strain  
73 is transported to another microbe, where it can be further metabolised to the final  
74 desired metabolite. Co-cultures allow a symbiotic relationship between strains for the  
75 utilization of multiple substrates and removal of inhibitory by-products. Some challenges  
76 in co-culture studies include compatibility between the strains concerning their growth  
77 conditions such as temperature, pH, and media (2).

78 Computational modelling of co-cultures is feasible with the use of genome-scale  
79 metabolic models (GSMMs). GSMMs of micro-organisms computationally describe the  
80 metabolism of an organism through the gene-protein-reaction associations. Progress in  
81 the reconstructions of GSMMs has allowed a wide variety of metabolic studies by  
82 generating model-driven hypotheses and context-specific simulations by the integration  
83 of various omics and kinetic data. GSMMs have been used to predict targets for gene  
84 manipulation either through knock-out or up- and downregulation, which has resulted in  
85 improved production of industrially relevant chemicals from micro-organisms (3). In an  
86 *E. coli* strain (XB201T) producing 0.55 g/L of D-phenyl lactic acid, knock-outs of *tyrB* and  
87 *aspC* genes that were identified as potential knock-out candidates from in silico analysis  
88 enhanced the production to 1.62 g/L (3).

89 The use of constraint-based modelling approaches with microbial community models is  
90 also underway to study metabolic interactions between the species (4–6). In the current  
91 study, we present a constraint-based modelling approach called CAMP (Co-  
92 culture/Community Analyses for Metabolite Production) which evaluates a set of GSMMs  
93 to identify suitable two-species communities that can produce a given metabolite. We  
94 demonstrate this approach by analysing GSMMs of selected Lactic Acid Bacteria (LAB) to

95 construct two-species communities and examine their potential for optimal production  
96 of lactate.

97 Lactate is an  $\alpha$ -hydroxy carboxylic acid that is chemically reactive and is synthesised to  
98 various intermediates such as acrylic acid, 1,2-propanediol, and lactide. Lactide is the  
99 building block for producing polylactic acid (PLA) (7). PLA is a biodegradable biopolymer  
100 that finds applications in the biomedical industry to manufacture stents, surgical sutures,  
101 soft-tissue implants, etc. (8). Lactic acid is also used in the food industry as an acidulant,  
102 a preservative, and an emulsifier (7). The D-isomer is considered harmful to humans in  
103 high doses. It can cause acidosis or de-calcification; hence, the L-isomer of lactate is  
104 preferred in the food and pharmaceutical industry (9).

105 Microbial fermentation is an effective route to produce lactate, as optically pure D- or L-  
106 lactate can be produced based on the selection of appropriate micro-organisms. LAB can  
107 be classified as either homofermentative or heterofermentative, depending on the  
108 metabolism of hexoses and pentoses, and the production of end products. In  
109 homofermentative cases, the sugars are metabolised via the Embden-Meyerhof-Parnas  
110 (EMP) pathway, whereas in the heterofermentative case, the phosphoketolase pathway  
111 is active (10).

112 In *Lactobacillus* co-cultures of *L. brevis* and *L. plantarum* with glucose and xylose as  
113 substrates and NaOH treated corn stover, high lactate yields of 0.8 g/g were obtained,  
114 which is more significant than in monocultures of the same species (11). *L. rhamnosus*  
115 and *L. brevis* were also used in co-culture, and a lactate productivity of 0.7 gL<sup>-1</sup>h<sup>-1</sup> was  
116 obtained (12). Co-culture of *L. pentosus* and genetically engineered *Enterococcus faecalis*  
117 produced 3.68 gL<sup>-1</sup>h<sup>-1</sup> of lactate (1). A consortium of cellulolytic fungus *Trichoderma*  
118 *reesei* and *L. pentosus* fermented on whole-slurry pre-treated beech wood led to the

119 production of 19.8 g/L of lactic acid. *L. pentosus* consumed cellobiose, avoiding inhibition  
120 of *T. reesei* cellulase activity, and acetic acid produced from *L. pentosus* was utilised as a  
121 carbon source by the fungus (13). GSMMs of various LAB such as *Lactobacillus reuteri*,  
122 *Leuconostoc mesenteroides*, *Lactobacillus plantarum*, *Lactobacillus casei*, *Lactococcus*  
123 *lactis*, and *Streptococcus thermophilus* have been published (14).

124 We used the CAMP approach to predict growth rates of LAB species in monoculture and  
125 co-culture. We categorised the interactions in LAB communities based on the changes in  
126 predicted growth rates, either unidirectional such as commensalism, amensalism, and  
127 neutralism, or bi-directional such as mutualism and competition. We analysed the effects  
128 of single and multiple nutrient substrates on interaction types between communities. We  
129 examined the metabolites that are exchanged between the species of a community. We  
130 predicted reaction knock-outs in LAB communities that would improve lactate flux.  
131 Overall, our strategy is generic, and it can be applied to identify communities to produce  
132 specific metabolites of interest. We postulate that this analysis strategy will benefit  
133 metabolic engineering applications that involve microbial communities.

## 134 **Results**

135 In this section, we present a brief overview of the CAMP approach, followed by its  
136 application to identify the most promising co-cultures to produce lactate.

### 137 **Overview of CAMP (Co-culture/Community Analyses for Metabolite Production)**

138 Fig. 1 gives an outline of the CAMP workflow. The steps include 1) Retrieval of microbial  
139 GSMMs from databases such as VMH. Each of these GSMMs is simulated in three different  
140 nutrient conditions (See Materials and Methods). Predicted growth rates and product flux  
141 are obtained using flux balance analysis (FBA) and flux variability analysis (FVA). The

142 product yield is computed as the maximum product flux obtained per unit flux of  
143 substrate uptake. 2) Two-species communities are created using SteadyCom (6).  
144 Community models are also simulated in three nutrient conditions. FBA and FVA are used  
145 to predict community growth rates and product yield in the community. Monoculture and  
146 co-culture growth rates are compared to identify an increase or decrease in growth when  
147 an organism is simulated in the presence of another. 3) Expected product yield in a  
148 community is compared to the observed product yield. Details on calculation of product  
149 yield can be found in Materials and Methods. Communities which have a 10-fold increase  
150 in product yield are regarded as candidate communities for optimal production of the  
151 target metabolite. Communities are assessed for their relative abundances, type of  
152 interaction behaviour observed and the cross-fed metabolites. 4) *In silico* community  
153 optimisation is performed using FSEOF (15), which enables to shortlist potential reaction  
154 knock-outs that will increase product flux in the community. Reaction knock-outs can be  
155 from either species in the community.

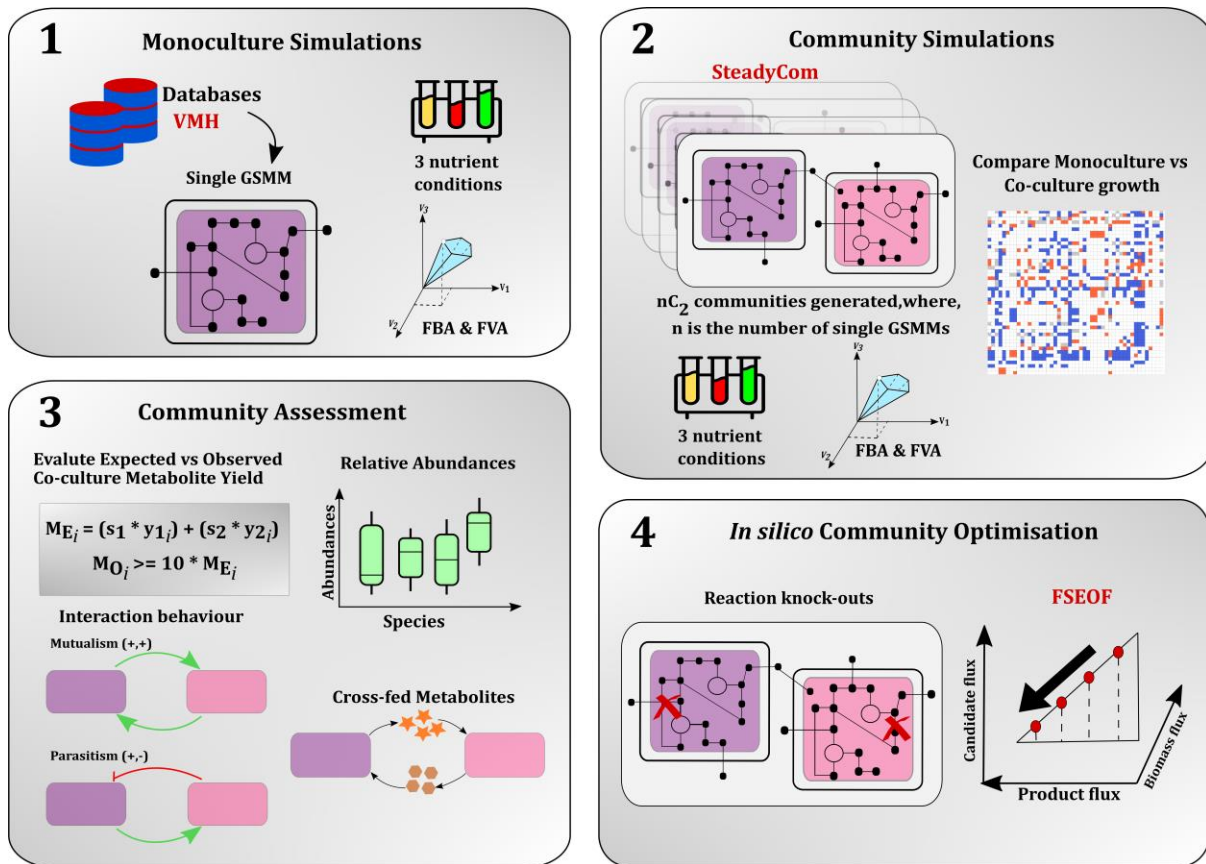

156

157 **Fig.1 Outline of CAMP (Co-culture/Community Analyses for Metabolite Production)**

158 **Growth phenotypes of LAB in monoculture**

159 For all 49 GSMMs, their predicted growth rates in monoculture with glucose and xylose  
 160 as major carbon sources were computed for the three different nutrient conditions —  
 161 minimal nutrient, excess nutrient, and community-specific nutrient condition (see  
 162 Materials and Methods). The maximal lactate fluxes of each model in all three conditions  
 163 were also computed. Supplementary Table S1 details the growth rates of each LAB  
 164 species in the different nutrient conditions. It was observed that for all models, the active  
 165 reactions that had a non-zero flux belonged to the central carbon metabolism, such as  
 166 Embden-Meyerhof-Parnas (EMP) pathway, pentose phosphate pathway (PPP), and the  
 167 pentose phosphoketolase (PPK) pathway (16) as seen in Fig. 2. Histogram distribution of  
 168 predicted monoculture growth rates (Supplementary Fig. S1) under the three nutrient



169 conditions shows that many species have similar growth rates in all conditions within the  
 170 range of 0.01 to 0.1 (h<sup>-1</sup>). The highest growth rates (> 0.3 h<sup>-1</sup>) are observed in the  
 171 community-specific and excess nutrient conditions.

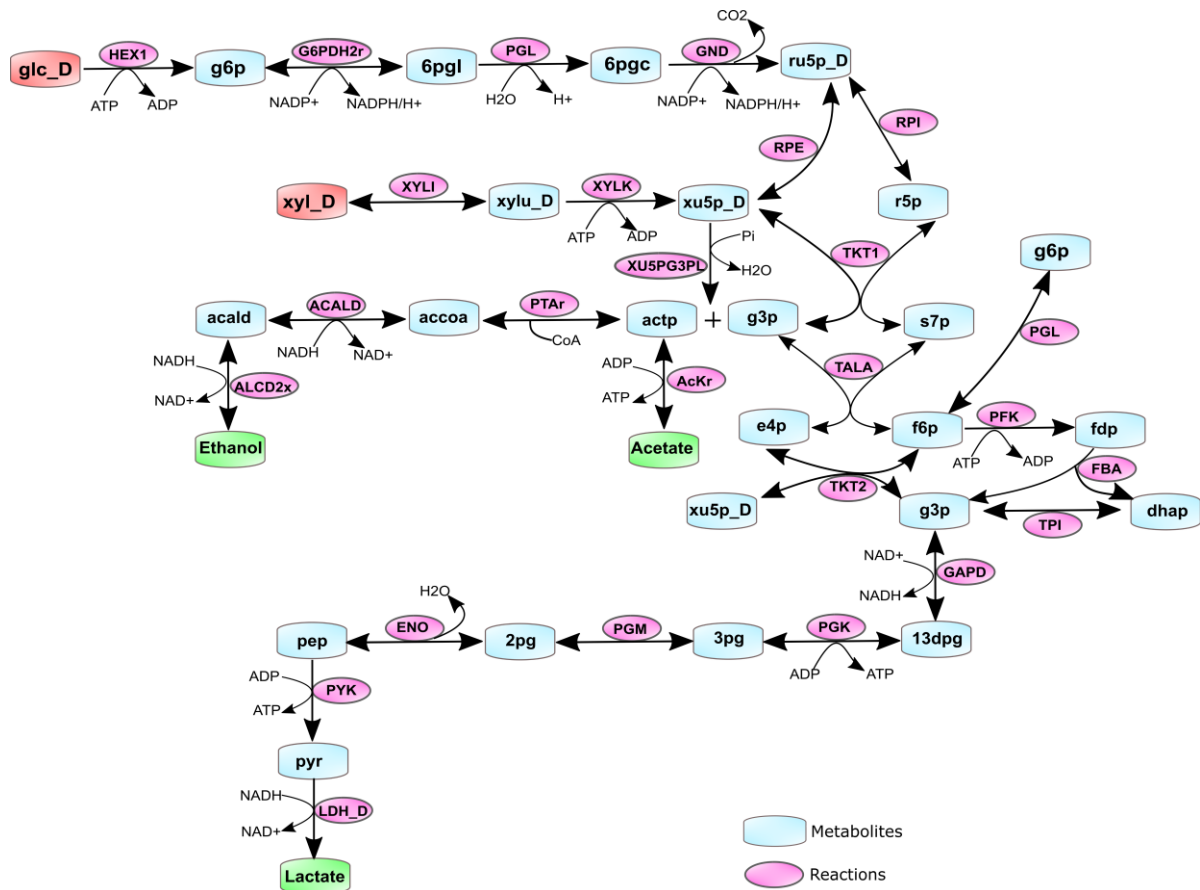

172

173 **Fig. 2: Active pathway reactions with non-zero fluxes in the LAB models when**  
 174 **grown in monoculture and co-culture.** Glucose and xylose (shaded red) are the  
 175 primary substrates that are metabolised to the end-products lactate, acetate, and ethanol  
 176 (shaded green). Metabolite and reaction notations and reaction directionalities are  
 177 denoted as seen in the LAB GSMMs.

178

179

180 **Significant change in monoculture vs. co-culture growth rates helps segregate**  
181 **communities into six categories**

182 A difference of 10% in predicted growth rates of the microbes in monoculture versus co-  
183 culture has been previously established to be significant (17). Based on these  
184 comparisons, viable LAB communities from each nutrient condition were binned into  
185 categories as follows: Amensal communities, i.e., one microbe grows slower in the paired  
186 simulation while the other microbe's growth rate is unaffected. Competitive  
187 communities, i.e., both microbes' growth, is slower than their monoculture rates.  
188 Parasitic communities, i.e., one microbe grows faster in the paired simulation while the  
189 other microbe grows slower. Neutral communities, i.e., neither microbes' growth rate  
190 was affected upon being paired with the other. Commensal communities, i.e., one  
191 microbe, has an increase in growth rate while the other remains unaffected. Lastly,  
192 mutualistic communities where both microbes in the pair show an increase in the growth  
193 rates compared to their monoculture rates. Fig.3 depicts the interaction behaviour in  
194 communities when each microbe influences the growth of the other, either positively or  
195 negatively.

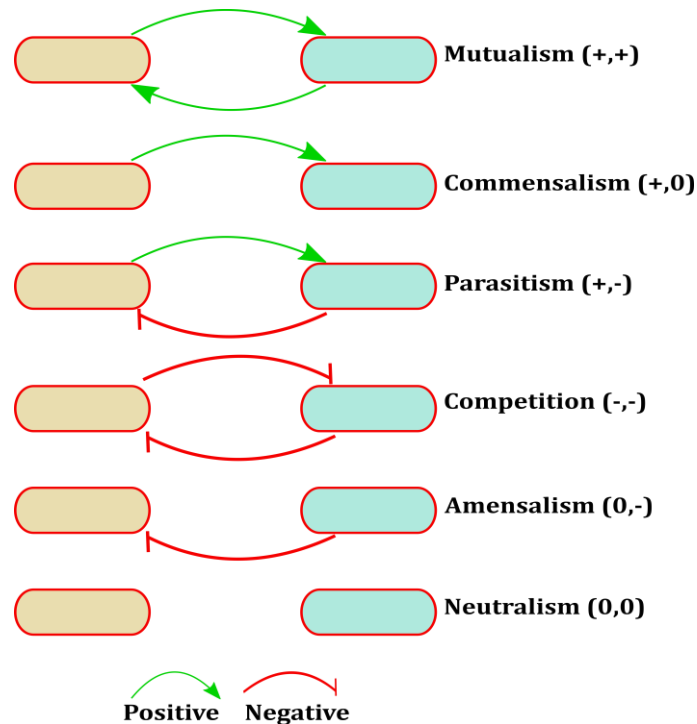

196

197 **Fig. 3 Different interaction types possible between the two-species communities. A**

198 positive or negative effect on the growth of the species defines each interaction type.

199 In community-specific nutrient conditions, 354 viable pairs out of 1176 were identified,

200 as seen in Fig. 4. Parasitism was the 'favoured' interaction type, with 235 pairs out of 354

201 displaying parasitic behaviour. In minimal nutrient conditions, there were 492 viable

202 pairs. Again, parasitism was dominant in this group, with 224 out of 492 pairs exhibiting

203 parasitism. In contrast, in the excess nutrient condition, from among 338 viable pairs, 215

204 pairs had amensal behaviour. Parasitism, mutualism, and commensal pairs were not

205 identified in this group. Heatmaps for the minimal and excess nutrient conditions are

206 provided as supplementary Fig.S2 & Fig.S3. Supplementary Fig. S4, S5 and S6 contain

207 heatmaps that depict the absolute values of the predicted growth rates of each species

208 grown in the presence of 48 other species.

209

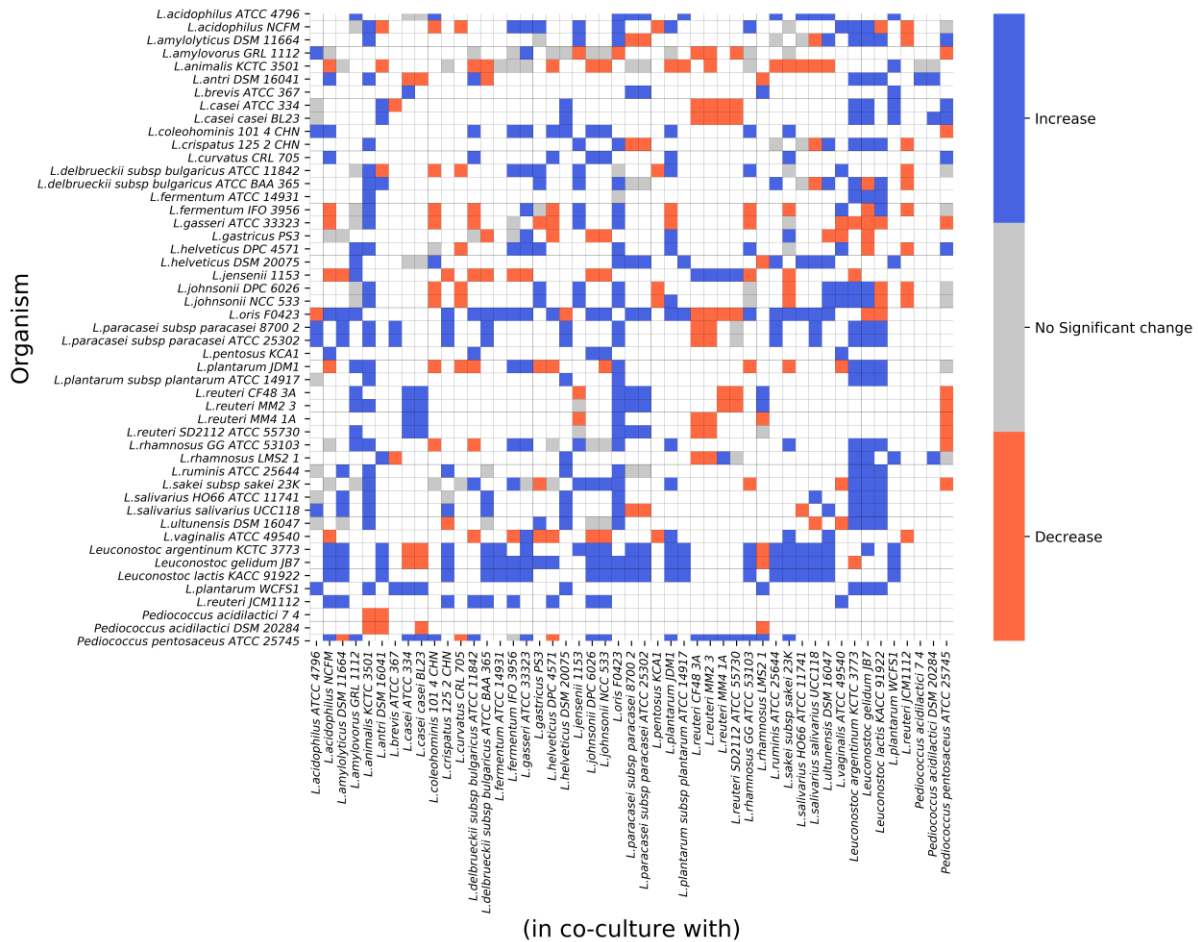

210

211 **Fig. 4: Monoculture vs. co-culture growth rates.** The heatmap depicts the change in the  
 212 growth rate of an organism’s predicted monoculture growth compared to when it is co-  
 213 cultured with another species under community-specific nutrient condition. A difference  
 214 greater than 10% of monoculture growth is considered an increase, whereas lesser than  
 215 10% of monoculture growth is regarded as a decrease. 822 non-viable pairs and the  
 216 diagonal, which represents 49 monocultures, are depicted as white squares.

217 **Occurrences and relative abundance profiles of the LAB species**

218 The frequency of occurrence of each microbe among the viable communities in each  
 219 nutrient condition was calculated. *L. oris* and *L. animalis* had the highest occurrences  
 220 among all *Lactobacillus* species. *Leuconostoc* species were also found to rank higher in the

221 number of occurrences among the viable set, irrespective of the nutrient condition. Each  
222 of these microbes was found in at least 20 pairs or more. *Pediococcus* species formed the  
223 least number of pairs in the community-specific nutrient condition. *L. pentosus* KCA1 was  
224 found to constitute the least number of viable pairs (less than 10) in all nutrient  
225 conditions.

226 The distribution of predicted relative abundances of each microbe when co-cultured  
227 under different nutrient conditions are shown in Fig 5. The abundances were found to  
228 vary depending upon the number of viable communities associated with each microbe.  
229 Differences were also seen among the nutrient conditions, with most LAB species having  
230 a mean abundance of lesser than 0.5 in the excess nutrient condition. *L. oris*, present in  
231 many viable communities, had an average abundance of less than 0.25 in the minimal and  
232 excess nutrient conditions. In contrast, it had an abundance higher than 0.5 in the  
233 community-specific condition. Relative abundances greater than 0.75 were seen among  
234 *Leuconostoc* species and some *Lactobacilli* species in the community-specific nutrient  
235 condition. This variation in abundance profiles highlights the role of nutrient constraints  
236 in driving community behavior.

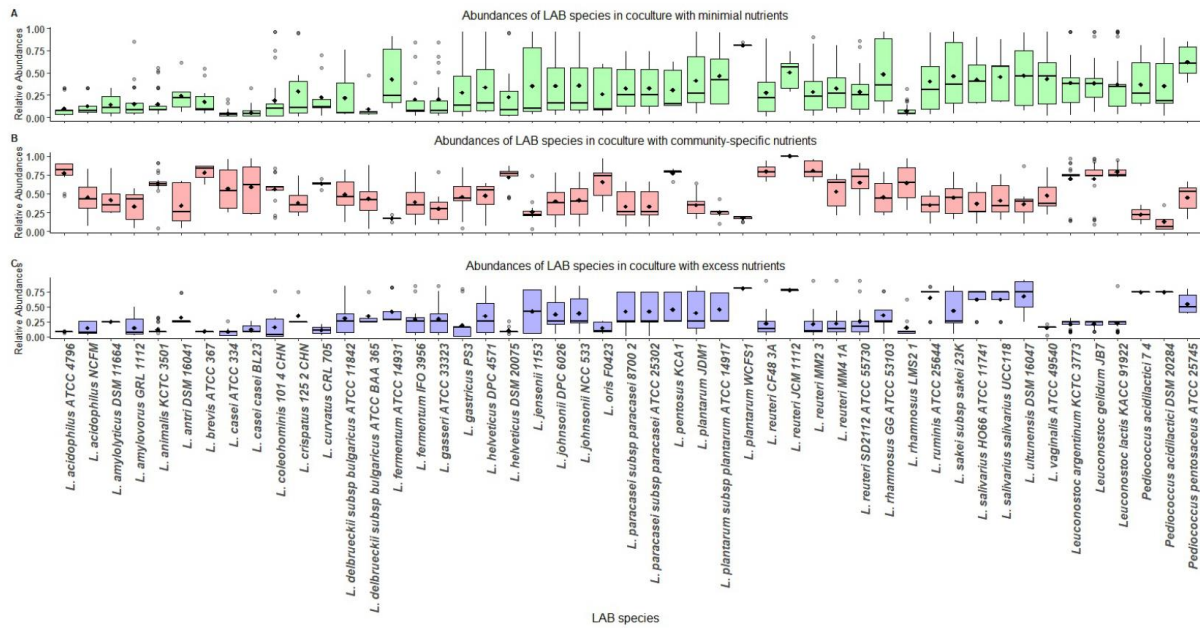

237

238 **Fig. 5. Relative abundance profiles of LAB species in co-culture under different**  
 239 **nutrient conditions (A) minimal nutrient condition (B) community-specific condition**  
 240 **(C) excess nutrient condition.**

241 **Dominant interaction behavior differs in communities grown with single and**  
 242 **multiple substrates**

243 To examine if the type of interaction detected in a community is dependent on the  
 244 number of carbon sources utilised, we simulated the community models for growth on  
 245 glucose and xylose independently. We compared these findings to when both glucose and  
 246 xylose are provided as substrates to the communities for growth. Fig. 6 highlights the  
 247 interaction types observed when either glucose or xylose is used as a substrate under  
 248 different nutrient conditions.

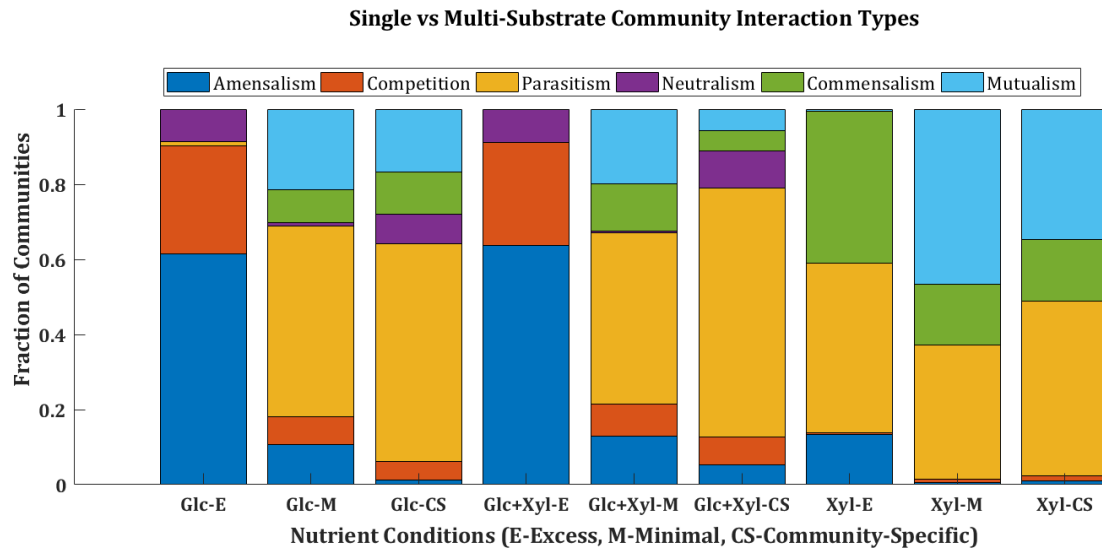

249

250 **Fig. 6 Distribution of the various interaction types between viable pairs in nine**  
251 **different nutrient conditions.** The plot shows the fraction of communities with a  
252 particular interaction type in each nutrient condition.

253 Among the 49 LAB models, only 11 models can metabolise xylose as a sole nutrient  
254 source. Mutualistic pairs constituted an average of 40% of viable pairs in minimal and  
255 community-specific conditions with xylose as substrate. The number of mutualistic pairs  
256 in xylose-only conditions indicates the rise of an emergent property in the community.  
257 Viable pairs with amensalism behaviour are found to be higher in excess nutrient  
258 conditions. Parasitism prevailed in both minimal and community-specific nutrient  
259 conditions irrespective of the presence of a single or multi-substrate. As all 49 organisms  
260 are capable of metabolising glucose, some competitive behavior is observed primarily in  
261 glucose-only excess conditions. Whereas, in xylose-only conditions, competition is almost  
262 absent, with only a maximum of three viable pairs exhibiting competition.

### 263 **Communities possess positively and negatively correlated cross-fed metabolites**

264 A metabolite was considered cross-fed if it was secreted (i.e., the flux of the exchange  
265 reaction for the particular metabolite was positive) into the community compartment (u)

266 by one organism and taken up (i.e., the flux of the exchange reaction of the metabolite  
267 was negative) by the other organism in the community. A threshold of 0.01 mmol/gDW/h  
268 was used to determine all such cross-fed metabolites for the viable communities in each  
269 nutrient condition. Fifty-three unique metabolites that included many amino acids were  
270 cross-fed between the LAB communities. This is consistent with other experimental  
271 observations where the exchange of amino acids is considered to play a role in  
272 community interactions (18, 19). The most widely cross-fed metabolites across all viable  
273 communities were acetaldehyde, glycine, H<sup>+</sup>, ethanol, H<sub>2</sub>O, acetate, formate, and NH<sub>4</sub><sup>+</sup>.  
274 Lactate was also found to be cross-fed between 35% of communities across different  
275 nutrient conditions. Each community model exchanged varied sets of metabolites  
276 depending on the nutrient condition it was simulated in. To check if certain metabolites  
277 are always cross-fed simultaneously in a community, the correlation between cross-fed  
278 metabolites across the LAB communities was estimated (Fig. 7). In the community-  
279 specific nutrient condition, positively correlated metabolites with a *p*-value significance  
280 of less than 0.05 (adjusted by the Benjamini-Hochberg method to control the false  
281 discovery rate) were identified to be ethanol and H<sub>2</sub>O, stearic acid and hypoxanthine, and  
282 formate and serine. Negatively correlated metabolites were formate and H<sub>2</sub>O, glycerol  
283 and acetaldehyde. We checked whether the cross-fed metabolites are specific to any  
284 interaction type and found that 24 metabolites are common to all interaction types. They  
285 include succinate, malate, formate, ethanol, acetate and some amino acids. The fraction  
286 of metabolites cross-fed in cooperative communities with mutualistic, commensal, and  
287 neutral interactions are higher than in communities which exhibit parasitic and  
288 competitive behaviour. Supplementary Table S2 has the list of cross-fed metabolites in  
289 each interaction type.



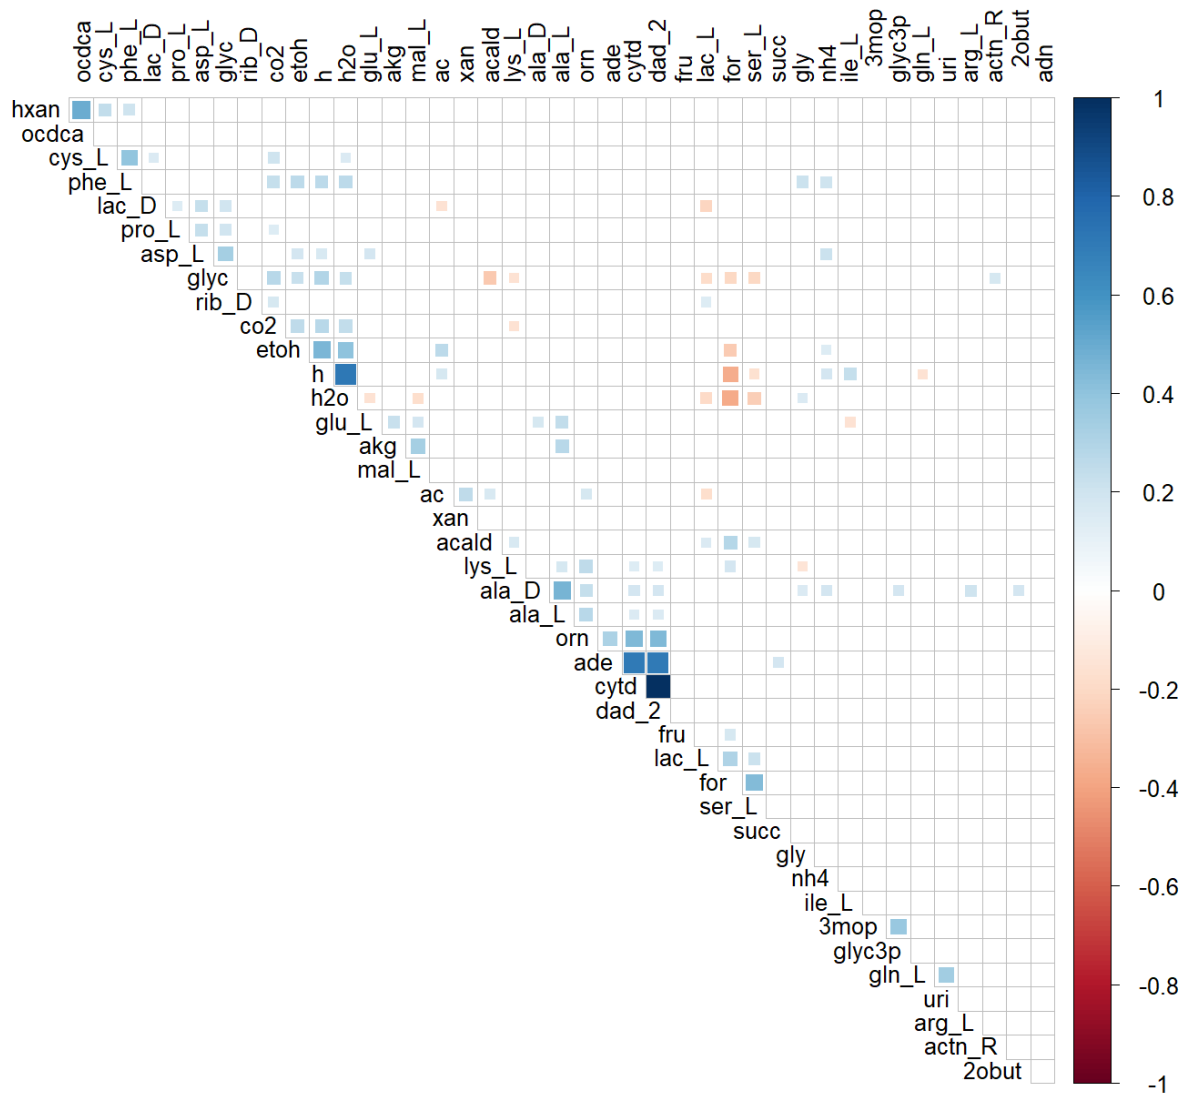

290

291 **Fig. 7 Correlation between the cross-fed metabolites in the community-specific**

292 **nutrient condition.** Positively correlated metabolites are denoted in blue, whereas

293 negatively correlated metabolites are coloured brown. Correlation plots for cross-fed

294 metabolites in the other two nutrient conditions are provided as Supplementary figures,

295 Fig. S7 and Fig. S8

296 **Evaluating performance of communities based on growth and lactate yield**

297 We evaluated the performance (see Materials and Methods) of the community models in

298 two scenarios. In the first set of simulations, lactate was not allowed to be cross-fed

299 between the community members. In the second case, one organism in the pair is

300 designated as the primary consumer of the substrates glucose and xylose, thereby  
301 creating a dependence of the second organism on the first for growth and vice-versa.  
302 Community pairs that retained their viability in the two test scenarios were deemed fit  
303 for further community strain optimisation strategies. This performance test was carried  
304 out in all three nutrient conditions. Forty community pairs were common in two nutrient  
305 conditions, community-specific nutrient uptake and minimal nutrient uptake. Seven LAB  
306 communities were unique to the excess nutrient condition. Each of these pairs had an  
307 observed lactate yield 10-fold higher than the expected lactate yield of the community.

308 **Glucose fermenters have higher lactate yield than communities where both xylose**  
309 **and glucose is utilised**

310 For grading the community pairs based on both their growth rate and product yield, the  
311 biomass, and lactate flux values were normalised (min-max normalization). Upon  
312 normalisation, the best pairs were identified. A detailed list of all communities is found  
313 in Supplementary Table S3. Each of the top six pairs shared an organism, namely, *L.*  
314 *plantarum* WCFS1, which is coupled with two strains of *L. casei*, *L. rhamnosus* LMS2, *L.*  
315 *animalis* KCTC 3501, *Leuconostoc argentinum*, and *Leuconostoc lactis*.

316 Contrary to expectations, in the best-performing pairs, both the organisms are not  
317 capable of utilising glucose and xylose together. Only the *Leuconostoc* species can  
318 metabolise both glucose and xylose, while the remaining organisms are glucose  
319 fermenters. The metabolic distances (Jaccard distances) between the GSMMs in the best-  
320 performing pairs were calculated (see Materials and Methods) using reaction lists from  
321 each model. The top-ranked pairs had a Jaccard distance of greater than 0.7, indicating  
322 that they had less than 30% of their reactions in common, and therefore, distinct  
323 metabolic capabilities. Besides, all the top-ranked communities displayed either

324 commensal, mutualistic, or neutral interaction behaviours in the three different nutrient  
 325 conditions. This suggests that metabolic complementarity and compatibility between the  
 326 organisms are necessary for the stability of a community.

327 **Elimination of reactions from competing pathways provide an enhanced lactate**  
 328 **flux in the LAB community**

329 Based on the FSEOF (Flux Scanning based on Enforced Objective Flux) approach (see  
 330 Materials and Methods), we were able to predict suitable reaction knock-outs in six LAB  
 331 community models that improved lactate flux in comparison to the flux obtained in the  
 332 wild-type community. These communities each had one organism from the *Leuconostoc*  
 333 genus, which are capable of fermenting both glucose and xylose. These community  
 334 species are heterofermentative, i.e., they are capable of production of mixed organic acids  
 335 such as ethanol, formate, acetate in addition to lactate. Among the predicted knock-out  
 336 targets, the reactions with a maximum increase of lactate flux are tabulated in Table 1.

| Reaction ID     | Reaction Name                                                | Reaction Formula                                                                                                   |
|-----------------|--------------------------------------------------------------|--------------------------------------------------------------------------------------------------------------------|
| <b>ACKr</b>     | acetate kinase                                               | acetate + ATP $\rightleftharpoons$ acetyl-phosphate + ADP                                                          |
| <b>PTAr</b>     | phosphotransacetylase                                        | acetyl-CoA + phosphate $\rightleftharpoons$ acetyl-phosphate + CoA                                                 |
| <b>PFL</b>      | pyruvate formate lyase                                       | pyruvate + CoA $\rightleftharpoons$ acetyl-CoA + formate                                                           |
| <b>FRD</b>      | fumarate reductase                                           | fumarate + ubiquinol-8 $\rightleftharpoons$ succinate + ubiquinone-8                                               |
| <b>RPE</b>      | ribulose 5-phosphate 3-epimerase                             | ribulose 5-phosphate $\rightleftharpoons$ xylulose 5-phosphate                                                     |
| <b>XU5PG3PL</b> | D-xylulose 5-phosphate<br>D-glyceraldehyde-3-phosphate-lyase | xylulose 5-phosphate + phosphate $\rightarrow$ acetyl-phosphate +<br>glyceraldehyde 3-phosphate + H <sub>2</sub> O |

337

338 **Table 1.** List of reaction knock-outs that lead to increased lactate flux in different LAB  
339 communities

340 As evident from these reactions, routes towards the production of other acids, such as  
341 acetate, formate, and succinate, are impeded to allow higher flux towards reactions  
342 leading to the biosynthesis of lactate. Supplementary Table S4 provides the details of  
343 predicted reaction knock-outs in each community model, and the equivalent lactate flux  
344 observed in that community upon deletion.

345 Our findings using this approach for microbial communities concur with experiments  
346 observed in literature where deletion of the genes counterpart to these reactions has  
347 increased the lactate yield from monocultures of various micro-organisms. An  
348 engineered strain of *Enterobacter aerogenes* ATCC 29007 with the phosphate  
349 acetyltransferase (*pta*) gene deletion was found to have a higher L-lactate yield by  
350 utilization of mannitol (20). *Escherichia coli* K12 strain MG1655 has been engineered by  
351 the inactivation of the pyruvate-formate lyase (*pflB*) and fumarate reductase (*frdA*) gene  
352 to increase the yield of D-lactate from glycerol (21). A single-gene knock-out of the *pflA*  
353 gene in the *E. coli* BW25113 strain has proven to improve D-lactate production from  
354 glucose (22). In *Saccharomyces cerevisiae*, the deletion of D-ribulose-5-phosphate 3-  
355 epimerase (RPE1) induces the simultaneous utilization of xylose and glucose (23). Gene  
356 knock-outs are one of the essential metabolic engineering strategies employed for  
357 overcoming barriers of carbon catabolite repression for the co-utilization of carbon  
358 sources by microbes (24, 25). Therefore, we hypothesise that to design efficient microbial  
359 communities, appropriate gene knock-outs from either one or both the organisms in a co-  
360 culture will enhance the co-utilization of mixed carbon substrates. In this regard, in silico

361 approaches as described above will aid in making informed decisions for knock-out  
362 experiments.

## 363 **Discussion**

364 Lactate synthesis through bacterial fermentation methods is of great importance for  
365 improving the compound's availability and aiding the production of lactate derivatives  
366 with high industrial value. While several computational approaches to study microbial  
367 communities have emerged in the recent years (6, 26–28), there is still no rigorous  
368 methodology to systematically choose a co-culture for optimal production of industrially  
369 relevant metabolites, such as the production of lactate. In this study, we report CAMP (Co-  
370 culture/Community Analyses for Metabolite Production), an approach to systematically  
371 screen multiple candidate communities on multiple substrates under different growth  
372 conditions and rank the best performing communities that are most likely to succeed in  
373 laboratory experiments. Our approach utilises emerging computational methods with  
374 GSMMs in the context of microbial communities of LAB. In pursuit of an ideal two-species  
375 community for lactate production, we established a framework where community  
376 growth is the objective, and the community model is tested for growth on two primary  
377 carbon sources, glucose, and xylose. Screening of viable communities based on predicted  
378 growth and lactate yield further enabled comparison between monoculture and co-  
379 culture states. Communities were labelled with specific interaction behaviours because  
380 of the changes observed in growth rates. The results obtained elucidated the role of single  
381 or multi-substrates for the prevalence of a particular interaction type in the communities.  
382 Certain cross-fed metabolites among the viable communities were either positively  
383 correlated or negatively correlated. This correlation occurred regardless of the  
384 interaction type of the community. A change in nutrient condition revealed differences in

385 the interaction behaviours of the communities, but this did not influence the results of  
386 the top-ranked communities based on lactate flux. A community comprising of *L. casei*  
387 ATCC 334 and *L. plantarum* WCFS1 was selected as the best-performing pair. These  
388 species have been used independently in industrial applications as starter cultures. *L.*  
389 *plantarum* is found in many ecological niches and is one of the model organisms in LAB  
390 research (29). The GEM of *L. plantarum* was one of the first reported GSMs from the  
391 LAB species (30). The presence of *L. plantarum* in the top-ranked pairs in our study  
392 reiterates the compatibility of this microbe with other LAB species and its utility for  
393 lactate production. Other *L. plantarum* and *Leuconostoc* species are used as co-cultures  
394 for fermentation of Chinese sauerkraut (31). *L. rhamnosus* strains have been co-cultured  
395 with *Saccharomyces cerevisiae* for enhanced exopolysaccharide production (32).  
396 *Pediococcus acidilactici* species have been co-cultured with *L. delbrueckii* species for  
397 pediocin production in milk (33).

398 Highly efficient micro-organisms are required to meet the industrial standards for lactic  
399 acid production. This can be achieved through perturbation, i.e., addition or deletion of  
400 genes that enhance the capability of the community to produce lactate. To address this  
401 aspect, we undertook an *in silico* strain optimisation approach using FSEOF to predict  
402 reactions that can be deleted to improve product flux. The results we observed were  
403 encouraging as they were in accordance with previously published experiments where  
404 gene deletion was utilised to enhance lactate yield in monocultures of different micro-  
405 organisms. These results also allude that gene knock-outs identified in monoculture can  
406 be extended to microbial communities as well. The gene knock-outs can be from one or  
407 both organisms in a co-culture. Co-cultures and communities of LAB can provide a  
408 significant advantage over the engineering of monocultures. With our framework, we  
409 have predicted LAB communities, which are useful candidates to produce lactate. These

410 predictions form a ready shortlist for experimental validation. Our workflow can be  
411 extended to communities of larger sizes as well, although the increase in combinatorial  
412 complexity will also demand an increase in computational cost. The caveat of this study  
413 is the dependence on the quality of the GSMMs used. The biochemical pathways to  
414 produce the metabolite of interest should also be well defined in the GSMMs.  
415 Nevertheless, as newer, more accurate reconstructions emerge, they can be used in our  
416 approach to present more accurate insights into the compatibility and interactions  
417 between organisms to choose the best possible community for a given application. Our  
418 approach provides a ready framework for the integration of additional experimental data  
419 arising from transcriptomics studies or <sup>13</sup>C metabolic flux analyses, to better constrain  
420 the models and improve the accuracy of the predictions.

421 In sum, we have presented a systematic workflow for the careful screening and analysis  
422 of many microbial co-cultures to produce the desired metabolite. Our method examines  
423 these co-cultures across growth conditions and across multiple substrates to identify the  
424 most promising candidates for experimental validation. Computational approaches, as  
425 presented in this study, can provide additional flexibility and valuable insights towards  
426 informing the selection of microbial co-cultures for metabolic engineering.

## 427 **Materials and Methods**

### 428 **GSMMs**

429 The Virtual Metabolic Human ([www.vmh.life](http://www.vmh.life)) repository was used for retrieving 47  
430 Lactic Acid Bacteria GSMMs. Models (AGORA version 1.03) of *Lactobacillus*, *Leuconostoc*,  
431 and *Pediococcus* species were obtained (34). Previously curated and published GSMMs of  
432 *L. plantarum* WCSF1 and *L. reuteri* JCM 1112 were also used to construct the synthetic

433 communities of LAB (14, 30). A list of all 49 GSMMs used in this study is tabulated in Table  
434 S1. Three models from VMH, namely, *L. amylolyticus*, *L. crispatus*, and *L. delbrueckii subsp.*  
435 *bulgaricus* ATCC BAA 365 did not have the necessary exchange and transport reactions  
436 for glucose. We added glucose exchange and transport reactions to these models, based  
437 on evidence from literature suggesting their capability to metabolise glucose (35).

### 438 **Creation and growth simulations of two-species communities**

439 We generated all possible pairwise combinations of the 49 species to yield 1176 synthetic  
440 LAB communities and simulated them using SteadyCom (6), a constraint-based  
441 modelling method for the creation and steady-state flux-balance analysis (FBA) of  
442 microbial communities. SteadyCom performs a community FBA by computing the  
443 relative abundance of each species with the objective function as maximisation of  
444 community growth.

445 LAB are known to be cultured in laboratories with MRS (deMan, Rogosa, and Sharpe)  
446 nutrient media. Analogous growth conditions were simulated *in silico* using nutrient  
447 uptake components for LAB models obtained from the KOMODO (Known Media  
448 Database) at ModelSEED (36). All known 20 amino acids were included in this nutrient  
449 media. Lignocellulose hydrolysate contains glucose and xylose as significant components.  
450 Hence, to mimic this substrate composition, we constrained the lower bounds of glucose  
451 and xylose exchange reactions in the community compartment (u) of the models.

452 Due to a lack of species-specific data for glucose and xylose uptakes, we considered three  
453 nutrient conditions: a) a minimal nutrient condition with -1 mmol/gDW/h of glucose and  
454 xylose each, b) an excess nutrient condition with constraints of -30 and -10 mmol/gDW/h  
455 for glucose and xylose, respectively, and c) finally a community-specific nutrient  
456 condition, where we identified the glucose and xylose uptake fluxes at half-maximal



457 growth rates of each model. The lower bounds of the amino acid exchange reactions and  
458 other essential components required for model growth were considered as -1 or -1000  
459 mmol/gDW/h (37). ATP maintenance constraints for all the LAB models were fixed at  
460 0.36 mmol/gDW/h, as observed in the curated *L. plantarum* WCFS1 and *L. reuteri* JCM  
461 1112 GSMMs. The growth simulations were performed in an anoxic environment, as LAB  
462 are anaerobic micro-organisms. Steady-state community growth rates, as well as species  
463 abundances, were computed. All simulations were performed in MATLAB R2018a  
464 (MathWorks Inc., USA) using the COBRA Toolbox v3.0 (38) and IBM ILOG CPLEX 12.8 as  
465 the linear programming solver.

#### 466 **Categorising communities based on interaction type**

467 Communities were categorised into six interaction types, namely, parasitism,  
468 amensalism, commensalism, mutualism, neutralism, and competitive, based on a 10%  
469 difference in growth rates of the microbe when grown in co-culture compared to when  
470 the bacterium is grown separately (17). Mutualism and commensalism have a positive  
471 effect on community partners, whereas parasitism, competition, and amensalism evoke  
472 a negative response on the growth of either partner.

#### 473 **Studying variation in lactate fluxes in a community using FVA**

474 We calculated the maximum lactate produced by a community using FVA on viable  
475 communities. FVA computes the flux range of every reaction by minimising and  
476 maximising the flux through the reactions (39). We considered a community to be viable  
477 if each organism in the community had a minimum growth rate of  $0.01 \text{ h}^{-1}$  or higher (40).  
478 While performing FVA, the biomass reaction in each community was constrained to the  
479 maximum community growth rate obtained. SteadyComFVA was used to calculate the

480 maximum flux through the lactate exchange reaction in the community compartment  
481 (“EX\_lac\_D(u”).

## 482 **Computing expected vs. observed lactate yield in each community**

483 The ConYE model proposed by Medlock *et al.* (41) for identifying metabolic mechanisms  
484 of interactions within gut microbiota was adapted to our study to calculate and compare  
485 the expected and observed lactate yield from each LAB community. The ConYE model  
486 identifies metabolites for which the consumption or production behaviour is altered in  
487 co-culture. Each strain is assumed to produce or consume a fixed quantity of each  
488 metabolite. This assumption is tested by comparing the expected behaviour to the  
489 observed co-culture data. The null hypothesis states that the metabolite in co-culture is  
490 equal to the predicted amount. Rejecting the null hypothesis implies that the co-culture  
491 has caused at least one species to significantly alter the metabolism of the metabolite  
492 (41).

493 With the lactate fluxes identified in monoculture conditions, an estimate of the lactate  
494 flux produced in co-culture can be made, considering the substrate utilisation by each  
495 species in co-culture. This computed expected yield of lactate is compared with the  
496 maximum lactate fluxes observed in the community compartment (u) in co-culture.

497  $\mathbf{M}o_i$  observed metabolite yield =

$$498 \frac{\text{maximum metabolite flux in coculture}}{\text{Total substrate uptake}}$$

$$499 \mathbf{M}Ei = (s_1 \times y_{1i}) + (s_2 \times y_{2i})$$

500  $\mathbf{M}Ei$  expected metabolite yield

501  $s_1$  total substrate uptake of species 1 in co-culture

502  $s_2$  total substrate uptake of species 2 in co-culture

503  $y_{1i}$  the maximum yield of metabolite  $i$  in species 1 in monoculture

504 
$$= \frac{\text{maximum metabolite flux of species 1}}{\text{substrate uptake of species 1}}$$

505  $y_{2i}$  the maximum yield of metabolite  $i$  in species 2 in monoculture

506 
$$= \frac{\text{maximum metabolite flux of species 2}}{\text{substrate uptake of species 2}}$$

507 If the observed yield of a community is 10-fold higher than the expected yield, i.e.

508  $M_{O_i} \geq 10 * M_{E_i}$ , the community is considered as a candidate pair for lactate production.

### 509 **Selection of product and growth-efficient communities**

510 Product and growth-efficient communities are defined as communities where a  
511 perturbation to the availability of substrates does not affect the viability of the  
512 community and the capability to produce lactate. To identify such product and growth-  
513 efficient communities, a set of simulations were performed. In the first simulation, the D-  
514 Lactate exchange reaction of one organism in the pair was blocked, which prevented  
515 cross-feeding of D-Lactate between the community members. Secondly, one organism in  
516 the pair was considered as the primary consumer of the substrates, while substrate  
517 consumption was blocked in the other organism. Community pairs that retained viability  
518 in all simulations were ranked after normalisation (min-max normalisation using the  
519 'rescale' function in MATLAB R2018a) of lactate yields and growth rates.

### 520 **Metabolic Distances of LAB communities**

521 We computed metabolic distances of all LAB models in each community as described in  
522 Magnúsdóttir et. al (42). The distance is calculated using the Jaccard distance. Metabolic

523 Distance =  $\frac{1-|R_i \cap R_j|}{|R_i R_j|}$ , where  $R_i$  is the reaction list from the model  $i$  and  $R_j$  is the reaction list  
524 of model  $j$ . Metabolic distance of 1 indicates that the two models do not share any  
525 reactions, whereas a metabolic distance of zero indicates that the models have identical  
526 reactions.

## 527 **Community optimisation and prediction of reaction knock-outs using FSEOF**

528 We performed strain optimisation methods such as the identification of knockout targets  
529 in each LAB community that would positively impact lactate production. To this end, we  
530 used the FSEOF (Flux Scanning based on Enforced Objective Flux) approach (15). Using  
531 FSEOF, potential reactions to be knocked out were selected based on metabolic flux  
532 scanning, which selects fluxes towards product formation. Other constraints used to  
533 predict reaction knock-outs included an increase in lactate flux of the mutant community  
534 model compared to wild-type and viability (i.e., a growth rate of 0.01 h<sup>-1</sup> or higher) of  
535 both organisms in the community. When the number of reactions obtained from FSEOF  
536 was less than or equal to an arbitrary threshold of 30, double deletions were carried out  
537 to test all possible knock-out combinations (i.e., a maximum of 435 double deletions) of  
538 these reactions. The threshold of 30 reactions was chosen for ease of computation. A  
539 suitable strategy was selected depending upon the contribution of each deletion towards  
540 an increase in lactate flux compared to the wild-type lactate flux. On the other hand, if the  
541 reaction list had greater than 30 reactions, only single reaction deletions were performed  
542 to identify potential knock-outs that improved lactate flux. For this *in silico* strain  
543 optimisation task, the COBRA Toolbox v3.0 functions '*removeRxns*' and '*optimizeCbModel*'  
544 were used for reaction deletions and FBA with optimisation of community biomass,  
545 respectively.

546

547 **Data availability**

548 All models used in this work and the codes used for our analysis are available at:

549 <https://github.com/RamanLab/CAMP>

550 **Acknowledgments**

551 M.I. acknowledges the IIT Madras Institute Post-Doctoral Fellowship and the Post-

552 Doctoral fellowship from Initiative for Biological Systems Engineering (IBSE), IIT Madras,

553 India.

554 **References**

555 1. Eş I, Mousavi Khaneghah A, Barba FJ, Saraiva JA, Sant'Ana AS, Hashemi SMB. 2018.

556 Recent advancements in lactic acid production - a review. *Food Res Int* 107:763–

557 770.

558 2. Jawed K, Yazdani SS, Koffas MA. 2019. Advances in the development and

559 application of microbial consortia for metabolic engineering. *Metab Eng Commun*

560 9:e00095.

561 3. Gu C, Kim GB, Kim WJ, Kim HU, Lee SY. 2019. Current status and applications of

562 genome-scale metabolic models. *Genome Biol* 20:1–18.

563 4. Stolyar S, Van Dien S, Hillesland KL, Pinel N, Lie TJ, Leigh JA, Stahl DA. 2007.

564 Metabolic modeling of a mutualistic microbial community. *Mol Syst Biol* 3:1–14.

565 5. Ye C, Zou W, Xu N, Liu L. 2014. Metabolic model reconstruction and analysis of an

566 artificial microbial ecosystem for vitamin C production. *J Biotechnol* 182–183:61–

567 67.

568 6. Chan SHJ, Simons MN, Maranas CD. 2017. SteadyCom: Predicting microbial

- 569 abundances while ensuring community stability. *PLoS Comput Biol* 13:1–25.
- 570 7. Dusselier M, Van Wouwe P, Dewaele A, Makshina E, Sels BF. 2013. Lactic acid as a  
571 platform chemical in the biobased economy: The role of chemocatalysis. *Energy*  
572 *Environ Sci* 6:1415–1442.
- 573 8. Farah S, Anderson DG, Langer R. 2016. Physical and mechanical properties of PLA,  
574 and their functions in widespread applications — A comprehensive review. *Adv*  
575 *Drug Deliv Rev* 107:367–392.
- 576 9. Alves de Oliveira R, Komesu A, Vaz Rossell CE, Maciel Filho R. 2018. Challenges  
577 and opportunities in lactic acid bioprocess design—From economic to production  
578 aspects. *Biochem Eng J* 133:219–239.
- 579 10. Juturu V, Wu JC. 2016. Microbial production of lactic acid: the latest development.  
580 *Crit Rev Biotechnol* 36:967–977.
- 581 11. Zhang Y, Vadlani P V. 2015. Lactic acid production from biomass-derived sugars  
582 via co-fermentation of *Lactobacillus brevis* and *Lactobacillus plantarum*. *J Biosci*  
583 *Bioeng* 119:694–699.
- 584 12. Cui F, Li Y, Wan C. 2011. Lactic acid production from corn stover using mixed  
585 cultures of *Lactobacillus rhamnosus* and *Lactobacillus brevis*. *Bioresour Technol*  
586 102:1831–1836.
- 587 13. Tarraran L, Mazzoli R. 2018. Alternative strategies for lignocellulose fermentation  
588 through lactic acid bacteria: The state of the art and perspectives. *FEMS Microbiol*  
589 *Lett* 365.
- 590 14. Kristjansdottir T, Bosma EF, Branco Dos Santos F, Özdemir E, Herrgård MJ, França  
591 L, Ferreira B, Nielsen AT, Gudmundsson S. 2019. A metabolic reconstruction of

- 592 Lactobacillus reuteri JCM 1112 and analysis of its potential as a cell factory.  
593 Microb Cell Fact 18:1–19.
- 594 15. Choi HS, Lee SY, Kim TY, Woo HM. 2010. In silico identification of gene  
595 amplification targets for improvement of lycopene production. Appl Environ  
596 Microbiol 76:3097–3105.
- 597 16. Spector MP. 2009. Encyclopedia of Microbiology. Encycl Microbiol 242–264.
- 598 17. Heinken A, Thiele I. 2015. Anoxic conditions promote species-specific mutualism  
599 between gut microbes In Silico. Appl Environ Microbiol 81:4049–4061.
- 600 18. D’Souza G, Shitut S, Preussger D, Yousif G, Waschina S, Kost C. 2018. Ecology and  
601 evolution of metabolic cross-feeding interactions in bacteria. Nat Prod Rep  
602 35:455–488.
- 603 19. Pacheco AR, Moel M, Segrè D. 2019. Costless metabolic secretions as drivers of  
604 interspecies interactions in microbial ecosystems. Nat Commun 10.
- 605 20. Thapa LP, Lee SJ, Park C, Kim SW. 2017. Production of L-lactic acid from  
606 metabolically engineered strain of Enterobacter aerogenes ATCC 29007. Enzyme  
607 Microb Technol 102:1–8.
- 608 21. Mazumdar S, Clomburg JM, Gonzalez R. 2010. Escherichia coli strains engineered  
609 for homofermentative production of D-lactic acid from glycerol. Appl Environ  
610 Microbiol 76:4327–4336.
- 611 22. Zhu J, Shimizu K. 2005. Effect of a single-gene knockout on the metabolic  
612 regulation in Escherichia coli for D-lactate production under microaerobic  
613 condition. Metab Eng 7:104–115.

- 614 23. Shen MH, Song H, Li BZ, Yuan YJ. 2015. Deletion of d-ribulose-5-phosphate 3-  
615 epimerase (RPE1) induces simultaneous utilization of xylose and glucose in  
616 xylose-utilizing *Saccharomyces cerevisiae*. *Biotechnol Lett* 37:1031–1036.
- 617 24. Wu Y, Shen X, Yuan Q, Yan Y. 2016. Metabolic engineering strategies for co-  
618 utilization of carbon sources in microbes. *Bioengineering* 3:1–10.
- 619 25. Chiang C, Lee HM, Guo HJ, Wang ZW, Lin L. 2013. Systematic Approach To  
620 Engineer *Escherichia coli* Pathways for.
- 621 26. Khandelwal RA, Olivier BG, Röling WFM, Teusink B, Bruggeman FJ. 2013.  
622 Community Flux Balance Analysis for Microbial Consortia at Balanced Growth.  
623 *PLoS One* 8.
- 624 27. Zomorodi AR, Maranas CD. 2012. OptCom: A multi-level optimization framework  
625 for the metabolic modeling and analysis of microbial communities. *PLoS Comput*  
626 *Biol* 8.
- 627 28. Ravikrishnan A, Raman K. 2018. *Systems-Level Modelling of Microbial*  
628 *Communities* 1st Editio. CRC Press.
- 629 29. Siezen RJ, van Hylckama Vlieg JET. 2011. Genomic diversity and versatility of  
630 *Lactobacillus plantarum*, a natural metabolic engineer. *Microb Cell Fact* 10:1–13.
- 631 30. Teusink B, Wiersma A, Molenaar D, Francke C, De Vos WM, Siezen RJ, Smid EJ.  
632 2006. Analysis of growth of *Lactobacillus plantarum* WCFS1 on a complex  
633 medium using a genome-scale metabolic model. *J Biol Chem* 281:40041–40048.
- 634 31. Xiong T, Peng F, Liu Y, Deng Y, Wang X, Xie M. 2014. Fermentation of Chinese  
635 sauerkraut in pure culture and binary co-culture with *Leuconostoc*  
636 *mesenteroides* and *Lactobacillus plantarum*. *LWT - Food Sci Technol* 59:713–717.



- 637 32. Bertsch A, Roy D, LaPointe G. 2019. Enhanced exopolysaccharide production by  
638 *Lactobacillus rhamnosus* in co-culture with *Saccharomyces cerevisiae*. *Appl Sci* 9.
- 639 33. Somkuti GA, Steinberg DH. 2010. Pediocin production in milk by *Pediococcus*  
640 *acidilactici* in co-culture with *Streptococcus thermophilus* and *Lactobacillus*  
641 *delbrueckii* subsp. *bulgaricus*. *J Ind Microbiol Biotechnol* 37:65–69.
- 642 34. Noronha A, Modamio J, Jarosz Y, Guerard E, Sompairac N, Preciat G, Daníelsdóttir  
643 AD, Krecke M, Merten D, Haraldsdóttir HS, Heinken A, Heirendt L, Magnúsdóttir S,  
644 Ravcheev DA, Sahoo S, Gawron P, Friscioni L, Garcia B, Prendergast M, Puente A,  
645 Rodrigues M, Roy A, Rouquaya M, Wiltgen L, Žagare A, John E, Krueger M,  
646 Kuperstein I, Zinovyev A, Schneider R, Fleming RMT, Thiele I. 2019. The Virtual  
647 Metabolic Human database: Integrating human and gut microbiome metabolism  
648 with nutrition and disease. *Nucleic Acids Res* 47:D614–D624.
- 649 35. Carr FJ, Chill D, Maida N. 2002. The lactic acid bacteria: A literature survey. *Crit*  
650 *Rev Microbiol* 28:281–370.
- 651 36. Henry CS, Dejongh M, Best AA, Frybarger PM, Linsay B, Stevens RL. 2010. High-  
652 throughput generation, optimization and analysis of genome-scale metabolic  
653 models. *Nat Biotechnol* 28:977–982.
- 654 37. Bauer E, Thiele I. 2018. From metagenomic data to personalized in silico  
655 microbiotas: predicting dietary supplements for Crohn’s disease. *npj Syst Biol*  
656 *Appl* 4.
- 657 38. Heirendt L, Arreckx S, Pfau T, Mendoza SN, Richelle A, Heinken A, Haraldsdóttir  
658 HS, Wachowiak J, Keating SM, Vlasov V, Magnúsdóttir S, Ng CY, Preciat G, Žagare  
659 A, Chan SHJ, Aurich MK, Clancy CM, Modamio J, Sauls JT, Noronha A, Bordbar A,

- 660 Cousins B, El Assal DC, Valcarcel L V., Apaolaza I, Ghaderi S, Ahookhosh M, Ben  
661 Guebila M, Kostromins A, Sompairac N, Le HM, Ma D, Sun Y, Wang L, Yurkovich JT,  
662 Oliveira MAP, Vuong PT, El Assal LP, Kuperstein I, Zinovyev A, Hinton HS, Bryant  
663 WA, Aragón Artacho FJ, Planes FJ, Stalidzans E, Maass A, Vempala S, Hucka M,  
664 Saunders MA, Maranas CD, Lewis NE, Sauter T, Palsson B, Thiele I, Fleming RMT.  
665 2019. Creation and analysis of biochemical constraint-based models using the  
666 COBRA Toolbox v.3.0. *Nat Protoc* 14:639–702.
- 667 39. Mahadevan R, Schilling CH. 2003. The effects of alternate optimal solutions in  
668 constraint-based genome-scale metabolic models. *Metab Eng* 5:264–276.
- 669 40. Devika NT, Raman K. 2019. Deciphering the metabolic capabilities of  
670 Bifidobacteria using genome-scale metabolic models. *Sci Rep* 9:1–9.
- 671 41. Medlock GL, Carey MA, McDuffie DG, Mundy MB, Giallourou N, Swann JR, Kolling  
672 GL, Papin JA. 2018. Inferring Metabolic Mechanisms of Interaction within a  
673 Defined Gut Microbiota. *Cell Syst* 7:245-257.e7.
- 674 42. Magnúsdóttir S, Heinken A, Kutt L, Ravcheev DA, Bauer E, Noronha A, Greenhalgh  
675 K, Jäger C, Baginska J, Wilmes P, Fleming RMT, Thiele I. 2017. Generation of  
676 genome-scale metabolic reconstructions for 773 members of the human gut  
677 microbiota. *Nat Biotechnol* 35:81–89.

678

679

680 **Supplemental Material**

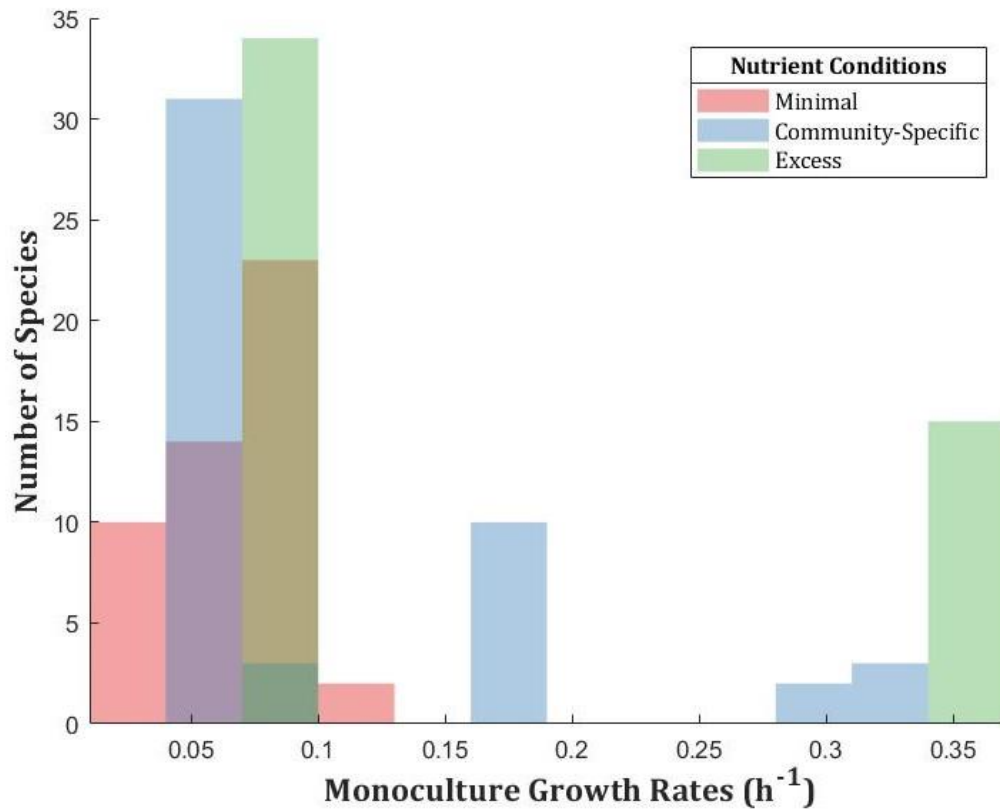

681

682 **Fig. S1: Histogram distribution of monoculture growth rates of all 49 species**  
683 **under three different nutrient conditions**

684

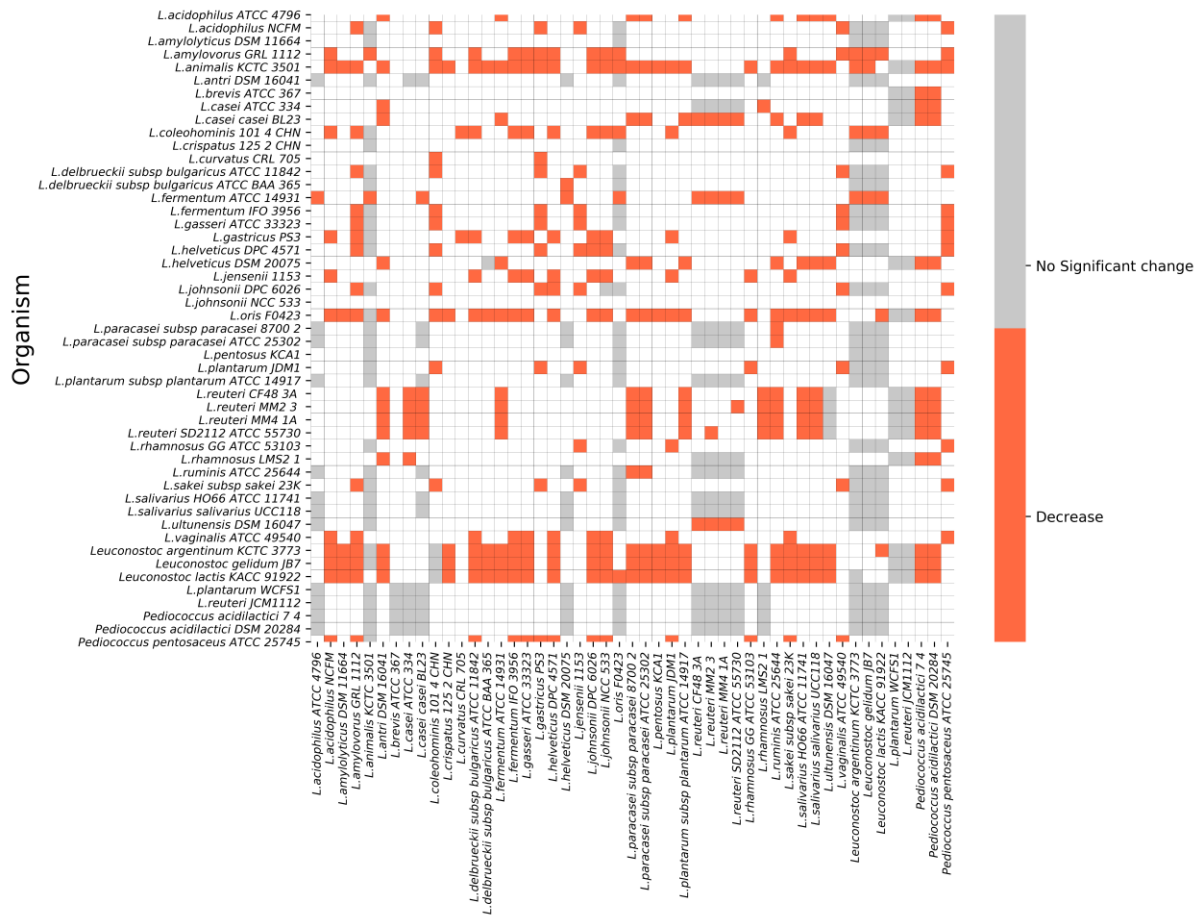

(in co-culture with)

685

686 **Fig. S2: Monoculture vs. Co-culture growth rates with excess nutrient uptake** The  
 687 heatmap depicts the change in the growth rate of an organism's monoculture growth  
 688 compared to when it is co-cultured with another species under excess nutrient uptake  
 689 condition. A difference lesser than 10% of monoculture growth is regarded as a decrease.  
 690 838 non-viable pairs and the diagonal, which represents 49 monocultures, are depicted  
 691 as white squares.

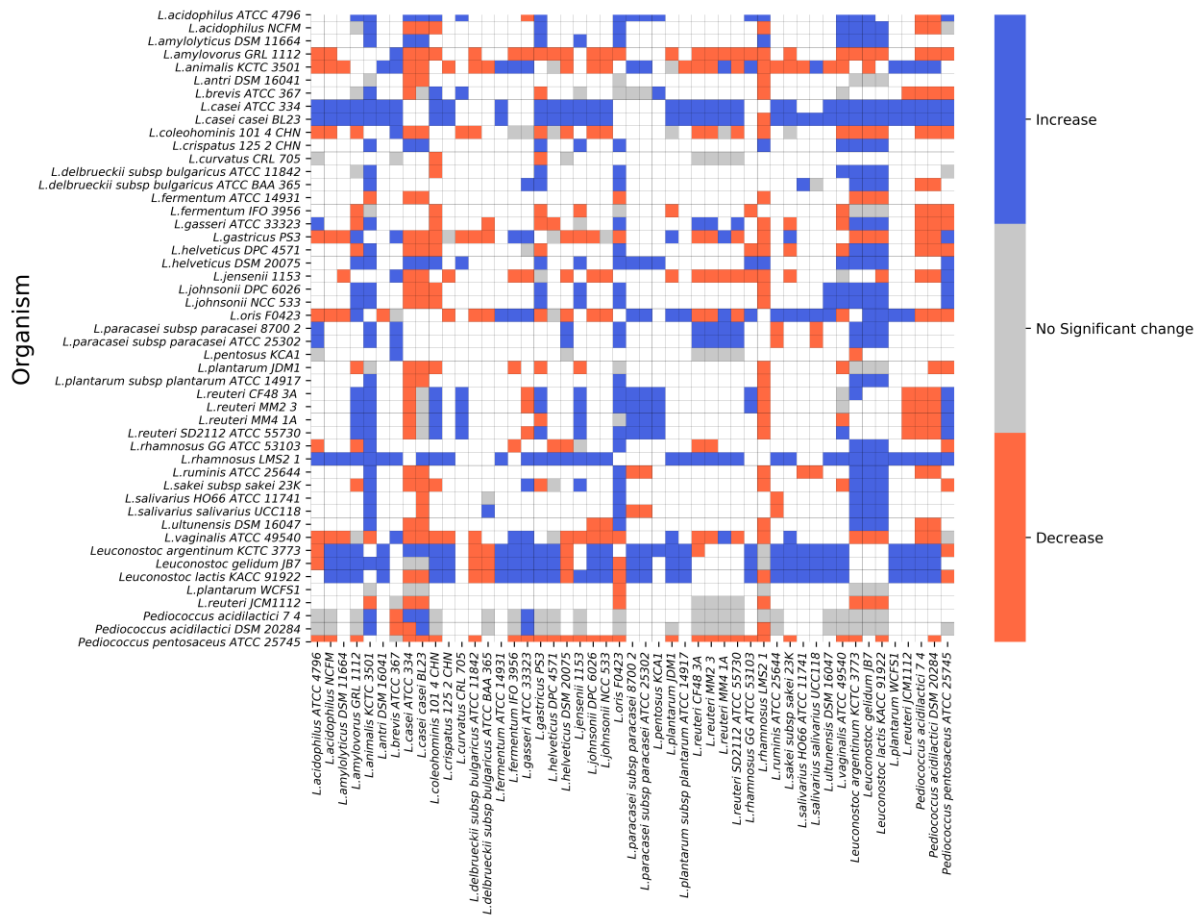

(in co-culture with)

692

693 **Fig. S3: Monoculture vs. Co-culture growth rates with minimal nutrient uptake.** The  
 694 heatmap depicts the change in the growth rate of an organism's monoculture growth  
 695 compared to when it is co-cultured with another species under minimal nutrient uptake  
 696 condition. A difference greater than 10% of monoculture growth is considered an  
 697 increase, lesser than 10% of monoculture growth is regarded as a decrease. 684 non-  
 698 viable pairs and the diagonal, which represents 49 monocultures, are depicted as white  
 699 squares.

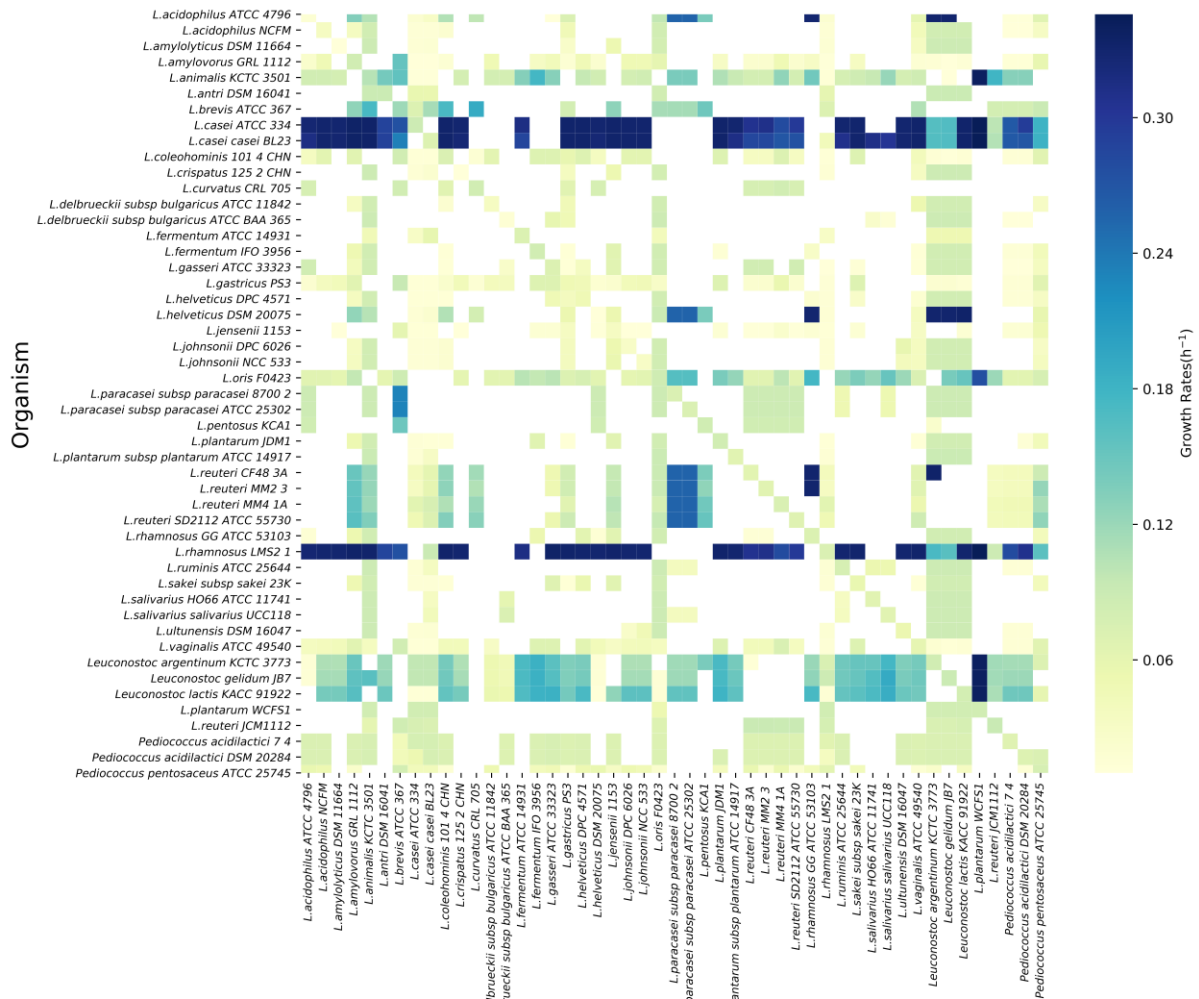

(in co-culture with)

700

701 **Fig. S4: Monoculture and Coculture growth rates with minimal nutrient uptake.**

702 The heatmap depicts the absolute values of the predicted growth rates of each organism

703 in the community. Diagonal elements represent the monoculture growth rates of all 49

704 species. Non-viable communities are denoted in white squares.

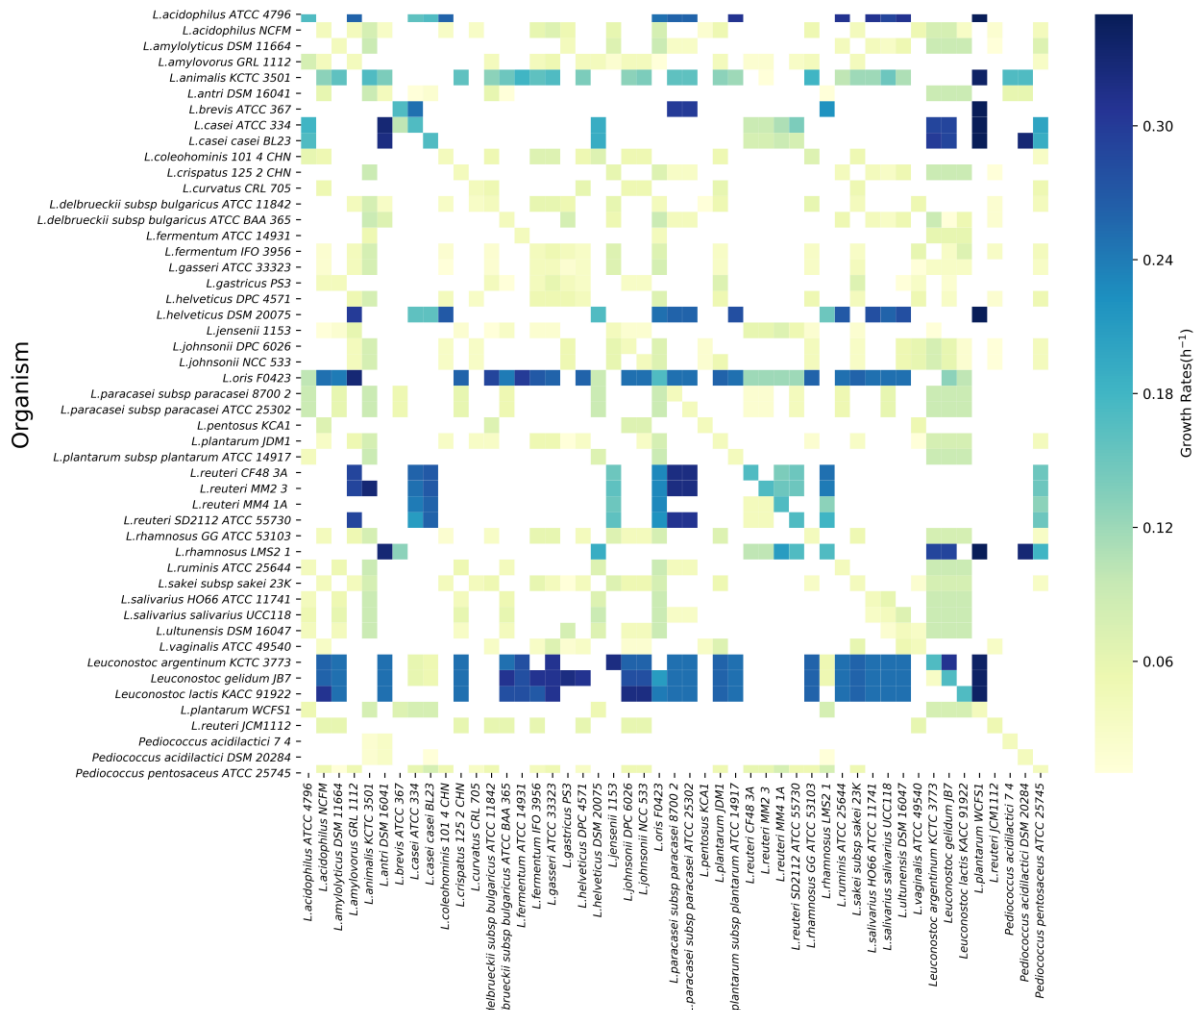

(in co-culture with)

705

706 **Fig. S5: Monoculture and Coculture growth rates with community-specific nutrient**  
 707 **uptake fluxes.** The heatmap depicts the absolute values of the predicted growth rates of  
 708 each organism in the community. Diagonal elements represent the monoculture growth  
 709 rates of all 49 species. Non-viable communities are denoted in white squares.

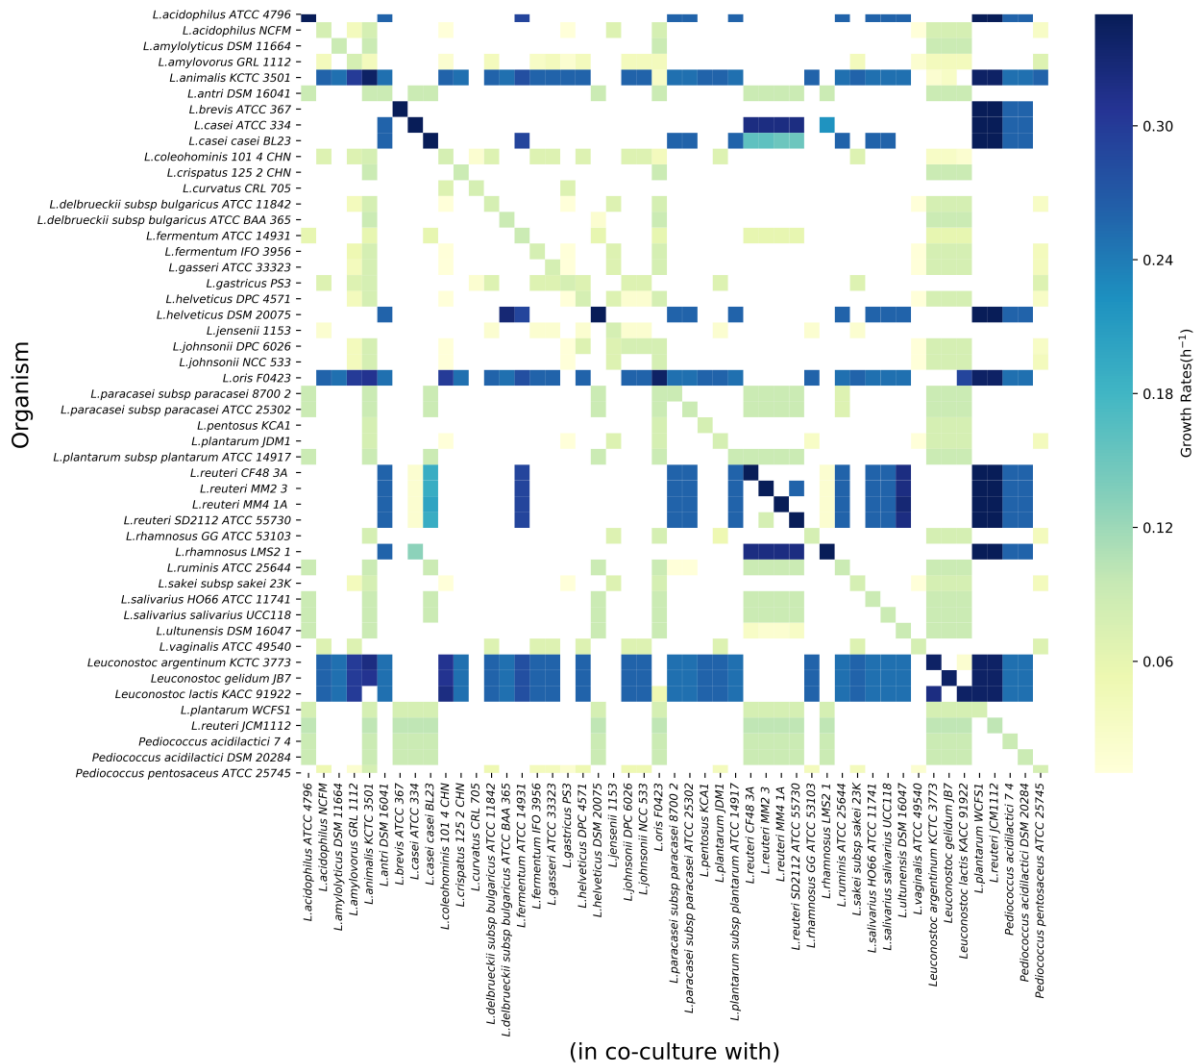

710

711 **Fig. S6: Monoculture and Coculture growth rates in excess-nutrient condition.** The  
 712 heatmap depicts the absolute values of the predicted growth rates of each organism in  
 713 the community. Diagonal elements represent the monoculture growth rates of all 49  
 714 species. Non-viable communities are denoted in white squares.

715

716



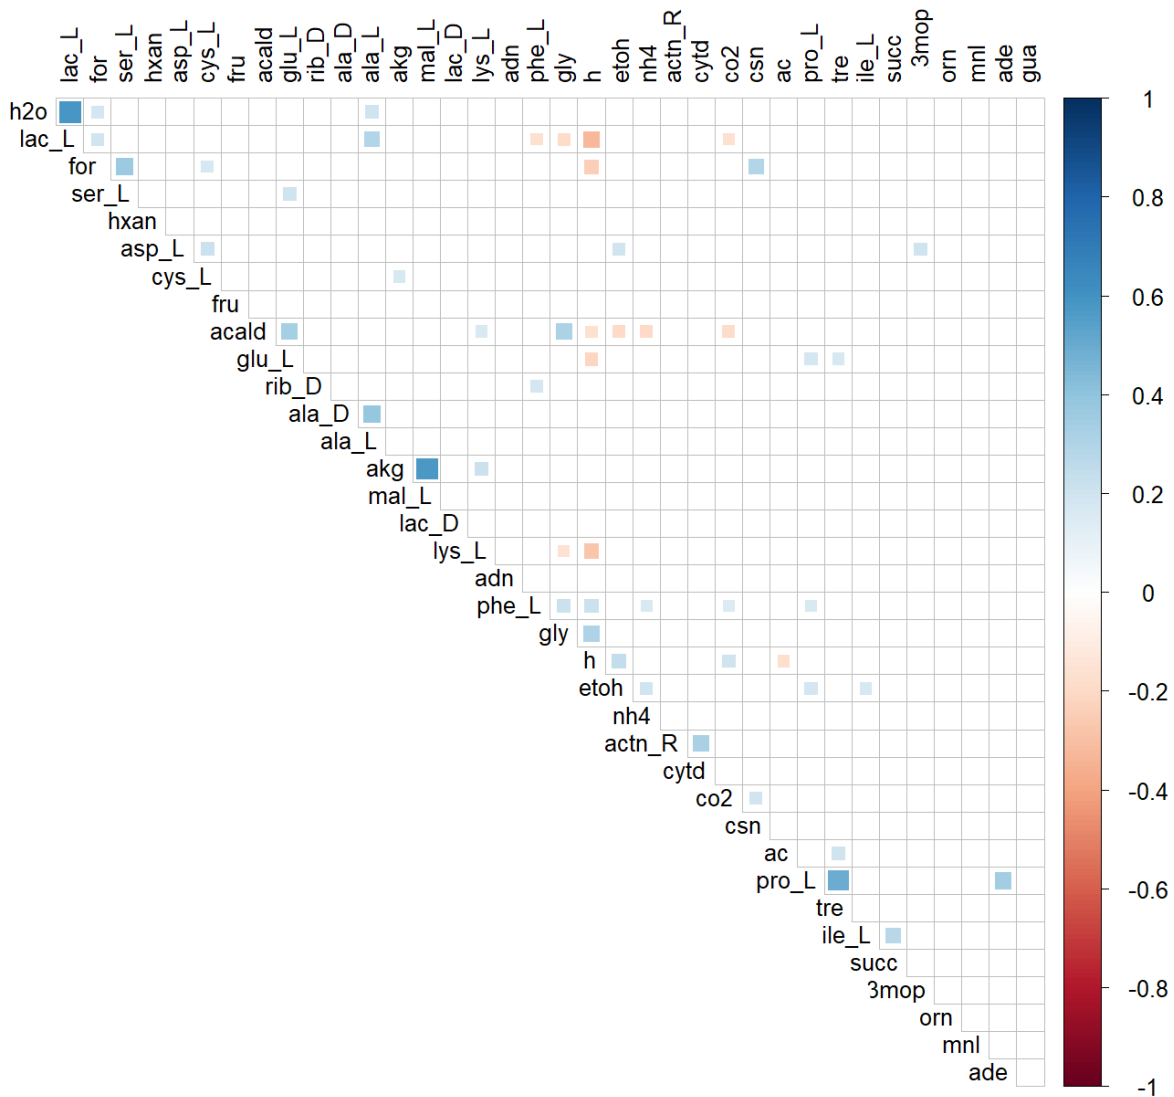

717

718 **Fig. S7 Correlation between the cross-fed metabolites in the excess nutrient**  
 719 **condition.** Positively correlated metabolites are denoted in blue, whereas negatively  
 720 correlated metabolites are denoted in brown. Alpha-ketoglutarate and malate, Proline  
 721 and trehalose are among the positively correlated metabolites.

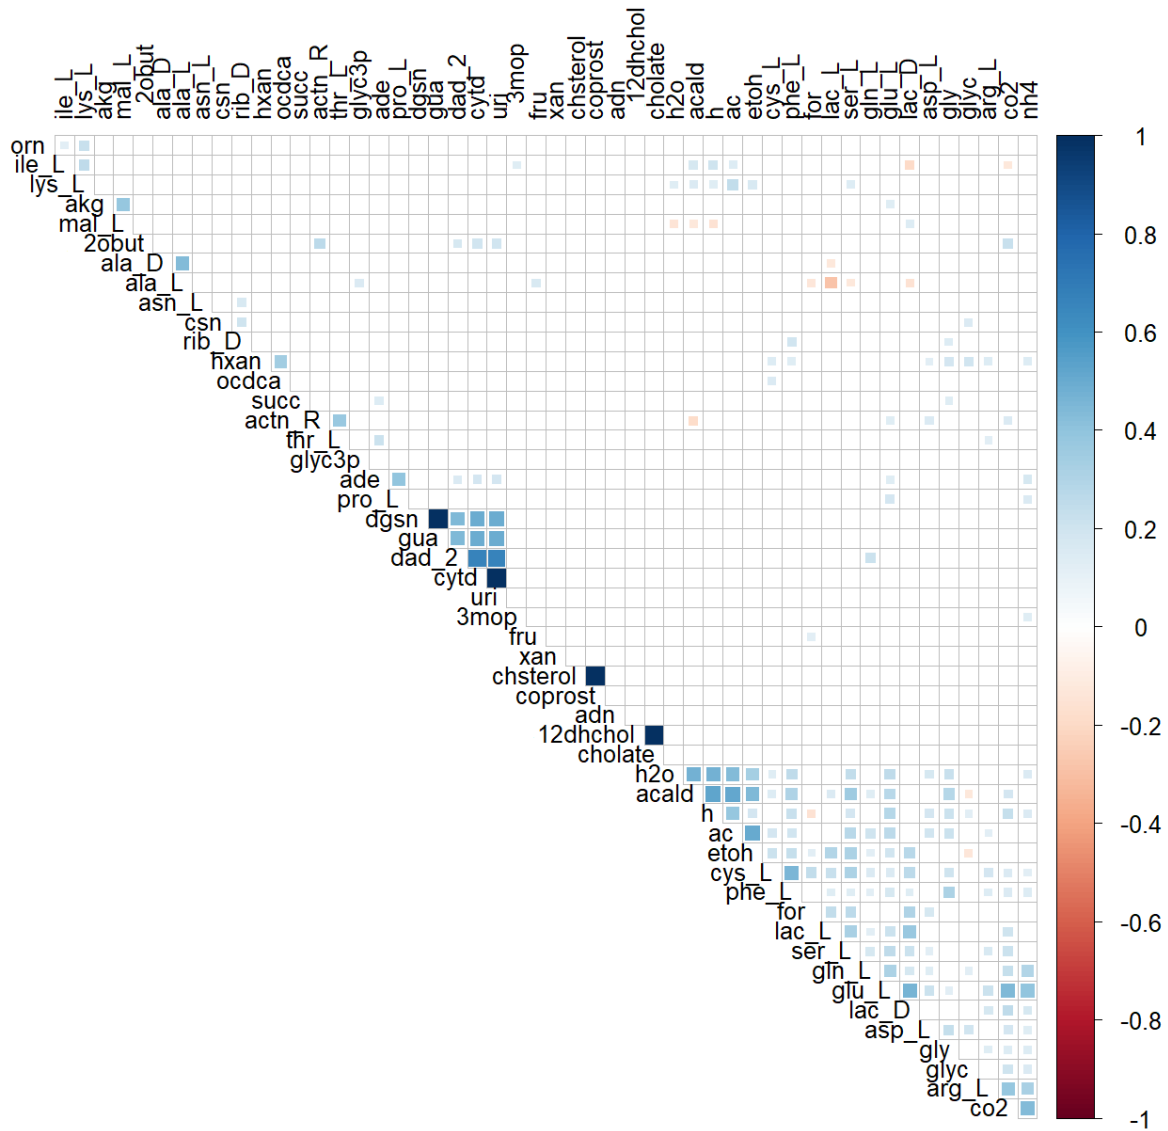

722

723

724 **Fig. S8 Correlation between the cross-fed metabolites in the minimal nutrient**  
725 **condition.** Positively correlated metabolites are denoted in blue, whereas negatively  
726 correlated metabolites are denoted in brown. Acetate and acetaldehyde, ethanol and  
727 acetaldehyde are among the positively correlated cross-fed metabolites.
